# Supplementary material for: [Ir(PPh3)2(H)2(ClCH2CH2Cl)][BArF4]: a well characterised transition metal dichloroethane complex
Source: Royal Society of Chemistry journal article supplement (doi:10.1039/b702399e), 2007-01-01
Supplement: b702399e.pdf [file b702399e.pdf]

## Supporting Information for

# **[Ir(PPh<sub>3</sub>)<sub>2</sub>(H)<sub>2</sub>(ClCH<sub>2</sub>CH<sub>2</sub>Cl)][BAr<sup>F</sup><sub>4</sub>]: A well characterised transition metal dichloroethane complex**

*Gemma L. Moxham, Simon K. Brayshaw, Andrew S. Weller\**

Department of Chemistry, University of Bath, Bath. BA2 7AY

## **Experimental**

All manipulations, unless otherwise stated, were performed under an atmosphere of argon, using standard Schlenk-line and glove-box techniques. Glassware was oven dried at 130°C overnight and flamed under vacuum prior to use. CH<sub>2</sub>Cl<sub>2</sub> and pentane were dried over activated alumina, copper and molecular sieves using an MBraun solvent purification system. CD<sub>2</sub>Cl<sub>2</sub> and ClCH<sub>2</sub>CH<sub>2</sub>Cl were distilled under vacuum from CaH<sub>2</sub> and stored over 3Å molecular sieves. Microanalyses were performed by Elemental Microanalysis Limited. Gas chromatography was performed using a Perkin-Elmer GC, helium carrier gas (14psi) injection volume 0.2 µl, oven temperature 40 °C and a flame ionisation detector. Data were analysed using the TurboChrom software package.

## ***NMR spectroscopy***

<sup>1</sup>H and <sup>31</sup>P{<sup>1</sup>H} spectra were recorded on Bruker Avance 400 MHz and Bruker Avance 500 MHz spectrometers. Residual protio solvent was used as reference for <sup>1</sup>H NMR spectra. <sup>31</sup>P{<sup>1</sup>H} spectra were referenced against 85% H<sub>3</sub>PO<sub>4</sub> (external). Chemical shifts are quoted in ppm. Coupling constants are quoted in Hz.

## ***X-Ray Crystallography***

Hemispheres of intensity data were collected at 150K on a Nonius Kappa CCD, using graphite monochromated MoKα radiation (λ = 0.71073 Å). Data were processed using the supplied Nonius software. Structure solution, followed by full matrix least squares refinement on *F*<sup>2</sup> (all data) was

performed using SHELX97 <sup>1</sup> under the WINGX 1.70 <sup>2</sup> package, after using SORTAV <sup>3</sup> for absorption correction. In the structure of **1** some disorder of the CF<sub>3</sub> groups in the anion was evident. For **1** the Iridium bound hydrogen atoms were located and reliably refined.

CCDC- 636296 contains additional supplementary crystallographic data for this paper. These data can be obtained free of charge from The Cambridge Crystallographic Data Centre via [www.ccdc.cam.ac.uk/data\\_request/cif](http://www.ccdc.cam.ac.uk/data_request/cif).

## Starting materials

The starting materials Na[BAr<sup>F</sup><sub>4</sub>], <sup>4</sup> [Ir(COD)Cl]<sub>2</sub>, <sup>5</sup> and [Ir(PPh<sub>3</sub>)<sub>2</sub>(COD)][BAr<sup>F</sup><sub>4</sub>]<sup>6</sup> were prepared by published literature methods or variations thereof.

## Synthesis of [Ir(PPh<sub>3</sub>)<sub>2</sub>(H)<sub>2</sub>-η<sup>2</sup>-(ClCH<sub>2</sub>CH<sub>2</sub>Cl)][BAr<sup>F</sup><sub>4</sub>] (**1**)

A solution of [(PPh<sub>3</sub>)<sub>2</sub>Ir(COD)][BAr<sup>F</sup><sub>4</sub>] (20mg, 1.18 x 10<sup>-5</sup> moles) in dichloroethane was freeze-thaw degassed and back-filled with H<sub>2</sub>. On warming to room temperature there was a colour change from red to colourless. X-ray quality crystals of **1** were obtained by diffusion of pentane into a solution of the compound in dichloroethane. Yield 12mg, 60%. Microanalysis: [(PPh<sub>3</sub>)<sub>2</sub>IrH<sub>2</sub>(C<sub>2</sub>H<sub>4</sub>Cl<sub>2</sub>)][BAr<sup>F</sup><sub>4</sub>] C<sub>70</sub>H<sub>48</sub>BCl<sub>2</sub>F<sub>24</sub>IrP<sub>2</sub> requires C 50.02%, H 2.88%. Found C 50.21%, H 2.91%.

<sup>1</sup>H NMR (δ/ppm C<sub>2</sub>H<sub>4</sub>Cl<sub>2</sub> 298 K) 7.67-6.85 (m, 42H, ArH), -23.84 (t, *J*(PH) 15 Hz, 2H, IrH). <sup>31</sup>P{<sup>1</sup>H} (δ/ppm C<sub>2</sub>H<sub>4</sub>Cl<sub>2</sub> 298 K) 19.1 (s).

*NMR spectra in CD<sub>2</sub>Cl<sub>2</sub> (a mixture of (1) and (2)):*

<sup>1</sup>H NMR (δ/ppm CD<sub>2</sub>Cl<sub>2</sub> 298 K) 7.74-6.88 (m, 42H, ArH), 3.23 (br s, 4H, C<sub>2</sub>H<sub>4</sub>Cl<sub>2</sub>), -25.08 (br s, 2H, IrH). <sup>31</sup>P{<sup>1</sup>H} (δ/ppm CD<sub>2</sub>Cl<sub>2</sub> 298 K) 21.4 (br s). <sup>1</sup>H NMR (δ/ppm CD<sub>2</sub>Cl<sub>2</sub> 270 K selected) 3.71 (br s, 1.8H, free C<sub>2</sub>H<sub>4</sub>Cl<sub>2</sub>), 2.27 (br s, 2.1H, bound C<sub>2</sub>H<sub>4</sub>Cl<sub>2</sub>), -23.47 (br s, 0.7H, IrH, **1**), -25.69 (br s, 0.5H, IrH, **2**). <sup>31</sup>P{<sup>1</sup>H} (δ/ppm CD<sub>2</sub>Cl<sub>2</sub> 270 K) 22.8 (br s, **2**) 19.2 (br s, **1**). <sup>1</sup>H NMR (δ/ppm CD<sub>2</sub>Cl<sub>2</sub> 250 K selected) 3.75 (s, 1.2H, free C<sub>2</sub>H<sub>4</sub>Cl<sub>2</sub>), 2.05 (2.3H, bound C<sub>2</sub>H<sub>4</sub>Cl<sub>2</sub>), -23.29 (t, *J*(PH) 15 Hz, 1.1H, IrH, **1**), -25.53 (br s, 0.3H, IrH, **2**). <sup>31</sup>P{<sup>1</sup>H} (δ/ppm CD<sub>2</sub>Cl<sub>2</sub> 250 K) 23.1 (br s, **2**) 19.3 (br s, **1**). <sup>1</sup>H NMR (δ/ppm CD<sub>2</sub>Cl<sub>2</sub> 220 K selected) 3.85 (s, 0.7H, free C<sub>2</sub>H<sub>4</sub>Cl<sub>2</sub>), 1.98 (s, 2.8H, bound C<sub>2</sub>H<sub>4</sub>Cl<sub>2</sub>), -23.12 (t, *J*(PH) 15 Hz, 1.3H, IrH, **1**), -25.29 (t, *J*(PH) 15 Hz, 0.1H, IrH, **2**). <sup>31</sup>P{<sup>1</sup>H} (δ/ppm CD<sub>2</sub>Cl<sub>2</sub> 220 K) 23.2 (br s, **2**) 19.7 (br s, **1**).

## Characterisation of [Ir(PPh<sub>3</sub>)<sub>2</sub>(H)<sub>2</sub>(ClCH<sub>2</sub>Cl)<sub>n</sub>][BAr<sup>F</sup><sub>4</sub>] (**2**) (n = 1 or 2)

Given that dichloromethane is a weakly coordinating solvent it was unclear whether **(2)** was a solvent compound or a complex containing an agostic interaction. To determine this, compound **(1)** was dissolved in a non-coordinating solvent, 3-fluorotoluene. Only resonances attributable to **(1)** were observed. Addition of 0.20 ml CD<sub>2</sub>Cl<sub>2</sub> to the solution of **(1)** in 3-fluorotoluene resulted in the appearance of new signals in approximately 10% intensity that corresponded to those previously reported for **(2)**.<sup>7</sup> This unequivocally confirms that **(2)** is a CD<sub>2</sub>Cl<sub>2</sub> complex. It does not, however, allow the distinction to be made between one or two bound CD<sub>2</sub>Cl<sub>2</sub> ligands. Given that all of the crystallographically characterised CH<sub>2</sub>Cl<sub>2</sub> complexes have shown only one CH<sub>2</sub>Cl<sub>2</sub> ligand,<sup>8</sup> we suggest a formulation of [Ir(PPh<sub>3</sub>)<sub>2</sub>(H)<sub>2</sub>(ClCH<sub>2</sub>Cl)][BAr<sup>F</sup><sub>4</sub>] for **(2)**.

#### **(1)** in 3-fluorotoluene

<sup>1</sup>H NMR (δ/ppm CH<sub>3</sub>C<sub>6</sub>H<sub>4</sub>F 298 K selected) -23.68 (t, *J*(PH) 15 Hz, IrH). <sup>31</sup>P{<sup>1</sup>H} (δ/ppm CH<sub>3</sub>C<sub>6</sub>H<sub>4</sub>F 298 K) 19.1 (s). <sup>1</sup>H NMR (δ/ppm CH<sub>3</sub>C<sub>6</sub>H<sub>4</sub>F 250 K selected) -23.28 (t, *J*(PH) 15 Hz, IrH). <sup>31</sup>P{<sup>1</sup>H} (δ/ppm CH<sub>3</sub>C<sub>6</sub>H<sub>4</sub>F 250 K) 19.2 (s).

#### **(1)** and **(2)** in 3-fluorotoluene and CD<sub>2</sub>Cl<sub>2</sub>

<sup>1</sup>H NMR (δ/ppm CH<sub>3</sub>C<sub>6</sub>H<sub>4</sub>F and CD<sub>2</sub>Cl<sub>2</sub> 250 K selected) -22.92 (br t, IrH, **1**) -25.20 (br, IrH, **2**). <sup>31</sup>P{<sup>1</sup>H} (δ/ppm CH<sub>3</sub>C<sub>6</sub>H<sub>4</sub>F and CD<sub>2</sub>Cl<sub>2</sub> 250 K) 19.6 (s, **1**) 23.5 (s, **2**).

#### **Methylcyclohexene hydrogenations**

In a Schlenk tube 5mg (2.96 x 10<sup>-6</sup> moles) of [(PPh<sub>3</sub>)<sub>2</sub>Ir(cod)][BAr<sup>F</sup><sub>4</sub>] was dissolved in 5 cm<sup>3</sup> CH<sub>2</sub>Cl<sub>2</sub> or C<sub>2</sub>H<sub>4</sub>Cl<sub>2</sub>. 100 equivalents of methylcyclohexene was added. The solution was freeze-thaw degassed and back filled with hydrogen. The solution was left stirring under 1 atmosphere of hydrogen at 22°C and samples were taken at 5 minute intervals for 30 minutes and then 15 minute intervals for a further 90 minutes. The samples were quenched with dppe and analysed using Gas chromatography.

## References

- 1 SHELXL97 - A program for crystal structure refinement. G. M. Sheldrick, **1997**.
- 2 WinGX-1.70: L. J. Farrugia, *J. Appl. Crystallogr.*, **1999**, 32, 837.
- 3 SORTAV: R. H. Blessing, *Acta. Crystallogr. A*, **1995**, 51, 33.
- 4 W. E. Schmann, J. S. Miller, *Inorg Synth.*, **2002**, 33, 85.
- 5 J. K. Herde, J. C. Lambert, C. V. Senoff, *Inorg. Synth.*, 1974, 15, 18.
- 6 A. Rifat, G. Kociok-Köhn, J. W. Steed, A. S. Weller, *Organometallics*, **2004**, 23, 428
- 7 G. L. Moxham, T. M. Douglas, S. K. Brayshaw, G. Kociok-Köhn, J. P. Lowe, A. S. Weller, *Dalton Trans.*, **2006**, 46, 5492 and the published correction (submitted).
- 8 For examples of CH<sub>2</sub>Cl<sub>2</sub> complexes see: M. D. Butts, B. L. Scott, and G. J. Kubas, *J. Am. Chem. Soc.*, **1996**, 118, 11831; D. J. Huang, J. C. Huffman, J. C. Bollinger, O. Eisenstein, and K. G. Caulton, *J. Am. Chem. Soc.*, **1997**, 119, 7398; F. L. Taw, H. Mellows, P. S. White, F. J. Hollander, R. G. Bergman, M. Brookhart, and D. M. Heinekey, *J. Am. Chem. Soc.*, **2002**, 124, 5100; J. Zhang, K. A. Barakat, T. R. Cundari, T. B. Gunnoe, P. D. Boyle, J. L. Petersen, and C. S. Day, *Inorg. Chem.*, **2005**, 44, 8379
